# Supplementary material for: SplitStrains, a tool to identify and separate mixed Mycobacterium tuberculosis infections from WGS data
Source: bioRxiv or medRxiv preprint supplement (doi:10.1101/2021.02.07.21250981), 2021-02-08

# Receiver Operating Characteristic

## Dataset A

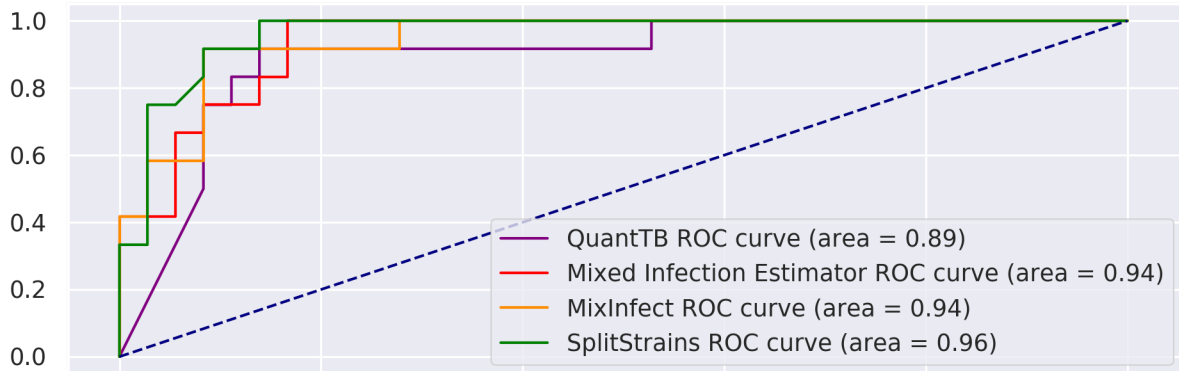

## Dataset B

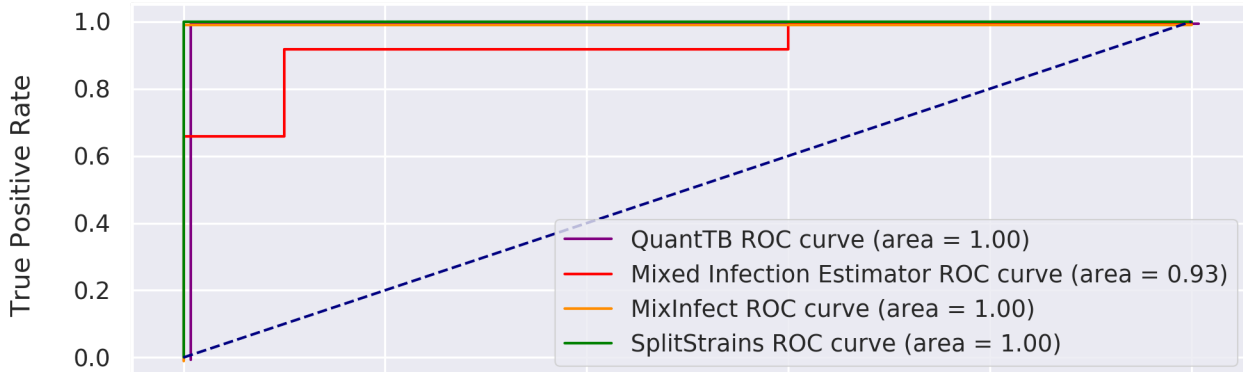

## Dataset C

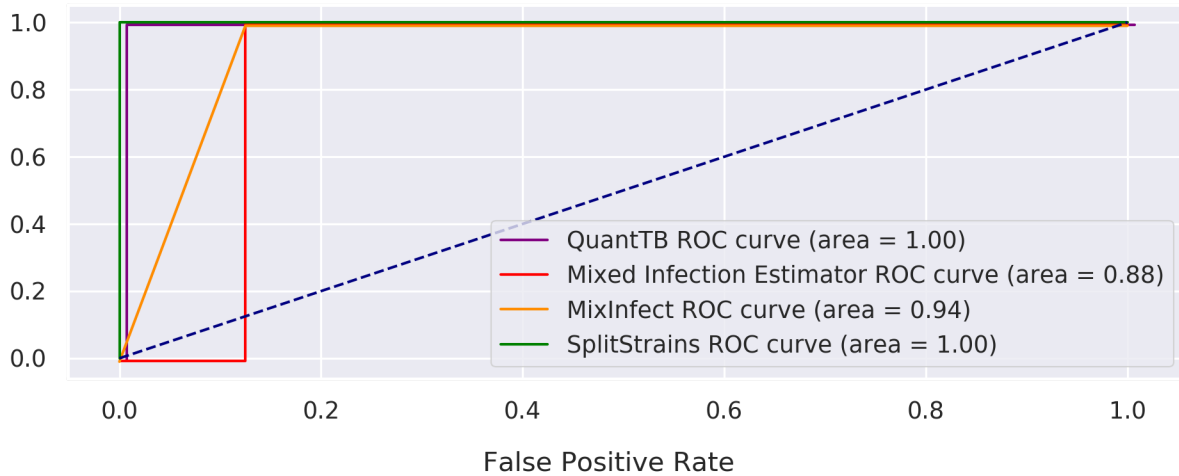

Supplement: Supplementary file [file media-1.pdf]
